# Supplementary material for: MOG-Specific T Cells Lead to Spontaneous EAE with Multilocular B Cell Infiltration in the GF-IL23 Model
Source: PubMed Central journal article supplement (PMC9684240; doi:10.1007/s12017-022-08705-2), 2022-03-03
Supplement: 12017_2022_8705_MOESM1_ESM.pdf [file 12017_2022_8705_MOESM1_ESM.pdf]

|        | GF23-2D2/2D2 |         | GF23-2D2/WT |         | GF23-2D2/GF23 |         |
|--------|--------------|---------|-------------|---------|---------------|---------|
|        | xlog2        | p value | xlog2       | p value | xlog2         | p value |
| CCL2   | 7.41         | 1.3E-05 | 6.85        | 3.6E-07 | 5.86          | 0.00023 |
| CCL3   | 4.23         | 0.012   | 5.17        | 0.00035 | 2.66          | 0.069   |
| CCL7   | 6.62         | 0.00028 | 5.24        | 0.00023 | 2.35          | 0.10    |
| CCL8   | 8.09         | 8.1E-11 | 6.50        | 3.1E-13 | 1.90          | 0.046   |
| CCR1   | 6.31         | 8.5E-05 | 6.72        | 1.0E-07 | 4.47          | 0.00047 |
| CCR6   | 8.04         | 1.2E-08 | 7.01        | 5.6E-14 | 4.98          | 2.0E-08 |
| CCR7   | 8.03         | 6.9E-07 | 6.08        | 1.9E-07 | 5.53          | 3.2E-05 |
| CXCL5  | 9.78         | 4.2E-11 | 5.93        | 6.9E-12 | 5.10          | 1.2E-07 |
| CXCL9  | 9.84         | 1.1E-10 | 6.74        | 1.6E-08 | 3.00          | 0.028   |
| CXCL10 | 10.51        | 4.2E-11 | 6.53        | 1.5E-11 | 3.43          | 0.0015  |
| CXCL11 | 5.10         | 6.0E-05 | 5.62        | 3.2E-07 | 4.16          | 0.00046 |
| CXCL13 | 5.39         | 0.016   | 8.03        | 4.8E-05 | 2.61          | 0.24    |
| CXCL16 | 5.81         | 1.3E-09 | 5.59        | 8.6E-12 | 3.41          | 0.00022 |
| CXCR3  | 7.03         | 9.6E-05 | 5.67        | 5.6E-05 | 3.06          | 0.033   |
| CXCR6  | 7.79         | 1.2E-06 | 5.95        | 3.7E-08 | 3.17          | 0.0046  |
| CD20   | 9.51         | 8.0E-12 | 7.48        | 1.5E-16 | 6.18          | 2.1E-11 |
| CD25   | 3.63         | 0.011   | 6.17        | 3.3E-06 | 5.50          | 0.00023 |
| CD27   | 5.06         | 2.1E-05 | 6.21        | 9.4E-09 | 5.46          | 5.6E-06 |
| CD40   | 8.86         | 9.2E-10 | 5.28        | 2.4E-10 | 3.82          | 1.9E-05 |
| CD44   | 2.44         | 0.0064  | 3.93        | 5.3E-07 | 2.98          | 0.0009  |
| CD69   | 7.86         | 0.096   | 7.78        | 0.054   | 8.15          | 0.084   |
| CD80   | 4.17         | 0.23    | 4.10        | 0.16    | 2.58          | 0.45    |
| CD86   | 2.93         | 0.0021  | 3.82        | 6.0E-06 | 2.49          | 0.0076  |
| H2-Eb1 | 5.35         | 7.4E-05 | 6.16        | 1.5E-07 | 2.32          | 0.085   |
| Icam1  | 8.79         | 3.1E-09 | 4.34        | 9.7E-08 | 2.67          | 0.0035  |
| IFNg   | 6.69         | 0.0016  | 5.35        | 0.0017  | 3.95          | 0.036   |
| IL-1a  | 4.17         | 0.17    | 3.62        | 0.16    | 1.19          | 0.68    |
| IL-1b  | 7.51         | 3.2E-08 | 6.47        | 6.9E-12 | 4.45          | 5.1E-06 |
| CD40lg | 6.16         | 0.0011  | 5.60        | 0.00022 | 4.03          | 0.017   |
